# Supplementary material for: The representation of Northern Hemisphere blocking in current global climate models
Source: Copernicus journal article supplement (doi:10.5194/wcd-2019-19), 2020-01-08
Supplement: Supplementary file 1 [file wcd-2019-19-supplement.pdf]

## Contents

### List of Tables

### List of Figures

|    |    |                                                                                                                                                                                                                                                                                                                                                                                                                                                                                                                                                                                                       |   |
|----|----|-------------------------------------------------------------------------------------------------------------------------------------------------------------------------------------------------------------------------------------------------------------------------------------------------------------------------------------------------------------------------------------------------------------------------------------------------------------------------------------------------------------------------------------------------------------------------------------------------------|---|
| 5  | S1 | Blocking frequency bias for the ANOM index, boreal winter, and (a) high-resolution forced, (b) high-resolution coupled, (c) low-resolution forced, (d) low-resolution coupled PRIMAVERA simulations, and (e) CMIP5, (f) CMIP6 simulations. Stippling shows agreement on the sign of the bias by at least (a,c) 6 of 6, (b,d) 6 of 7, (e) 19 of 29, and (f) 10 of 13 simulations. . . . .                                                                                                                                                                                                              | 3 |
| 10 | S2 | Blocking frequency bias for the ANOM index, boreal summer, and (a) high-resolution forced, (b) high-resolution coupled, (c) low-resolution forced, (d) low-resolution coupled PRIMAVERA simulations, and (e) CMIP5, (f) CMIP6 simulations. Stippling shows agreement on the sign of the bias by at least (a,c) 6 of 6, (b,d) 6 of 7, (e) 19 of 29, and (f) 10 of 13 simulations. . . . .                                                                                                                                                                                                              | 4 |
| 15 | S3 | Metrics of blocking performance (a,b - blocking frequency, c,d - spatial correlation, e,f - root-mean-square error) for the ANOM index and boreal winter, for the ATL domain (-90-90E, 50-90N). The left-hand side of each panel shows metrics for PRIMAVERA simulations at different grid spacings (resolutions). Boxplots on the right-hand side show distributions of the metric across CMIP5 and CMIP6 simulations. The '**' symbol in the column 'ERA/IV' shows the reanalysis estimate and the boxplot is an estimate of the expected agreement given internal variability (see text). . . . .  | 5 |
| 20 | S4 | Metrics of blocking performance (a,b - blocking frequency, c,d - spatial correlation, e,f - root-mean-square error) for the ANOM index and boreal summer, for the ATL domain (-90-90E, 50-90N). The left-hand side of each panel shows metrics for PRIMAVERA simulations at different grid spacings (resolutions). Boxplots on the right-hand side show distributions of the metric across CMIP5 and CMIP6 simulations. The '**' symbol in the column 'ERA/IV' shows the reanalysis estimate and the boxplot is an estimate of the expected agreement given internal variability (see text). . . . .  | 6 |
| 25 | S5 | Metrics of blocking performance (a,b - blocking frequency, c,d - spatial correlation, e,f - root-mean-square error) for the AGP index and boreal winter, for the PAC domain (90-270E, 50-75N). The left-hand side of each panel shows metrics for PRIMAVERA simulations at different grid spacings (resolutions). Boxplots on the right-hand side show distributions of the metric across CMIP5 and CMIP6 simulations. The '**' symbol in the column 'ERA/IV' shows the reanalysis estimate and the boxplot is an estimate of the expected agreement given internal variability (see text). . . . .   | 7 |
| 30 | S6 | Metrics of blocking performance (a,b - blocking frequency, c,d - spatial correlation, e,f - root-mean-square error) for the AGP index and boreal summer, for the PAC domain (90-270E, 50-75N). The left-hand side of each panel shows metrics for PRIMAVERA simulations at different grid spacings (resolutions). Boxplots on the right-hand side show distributions of the metric across CMIP5 and CMIP6 simulations. The '**' symbol in the column 'ERA/IV' shows the reanalysis estimate and the boxplot is an estimate of the expected agreement given internal variability (see text). . . . .   | 8 |
| 35 | S7 | Metrics of blocking performance (a,b - blocking frequency, c,d - spatial correlation, e,f - root-mean-square error) for the ANOM index and boreal winter, for the PAC domain (120-240E, 40-90N). The left-hand side of each panel shows metrics for PRIMAVERA simulations at different grid spacings (resolutions). Boxplots on the right-hand side show distributions of the metric across CMIP5 and CMIP6 simulations. The '**' symbol in the column 'ERA/IV' shows the reanalysis estimate and the boxplot is an estimate of the expected agreement given internal variability (see text). . . . . | 9 |
| 40 |    |                                                                                                                                                                                                                                                                                                                                                                                                                                                                                                                                                                                                       |   |

|    |     |                                                                                                                                                                                                                                                                                                                                                                                                                                                                                                                                                                                                       |    |
|----|-----|-------------------------------------------------------------------------------------------------------------------------------------------------------------------------------------------------------------------------------------------------------------------------------------------------------------------------------------------------------------------------------------------------------------------------------------------------------------------------------------------------------------------------------------------------------------------------------------------------------|----|
| 45 | S8  | Metrics of blocking performance (a,b - blocking frequency, c,d - spatial correlation, e,f - root-mean-square error) for the ANOM index and boreal summer, for the PAC domain (120-240E, 40-90N). The left-hand side of each panel shows metrics for PRIMAVERA simulations at different grid spacings (resolutions). Boxplots on the right-hand side show distributions of the metric across CMIP5 and CMIP6 simulations. The '**' symbol in the column 'ERA/IV' shows the reanalysis estimate and the boxplot is an estimate of the expected agreement given internal variability (see text). . . . . | 10 |
| 50 | S9  | Persistence of blocking events (a,b - median, c,d - 90th percentile) for the ANOM index and boreal winter, for the ATL domain (-90-90E, 50-90N). The left-hand side of each panel shows metrics for PRIMAVERA simulations at different grid spacings (resolutions). Boxplots on the right-hand side show distributions of the persistence metric across CMIP5 and CMIP6 simulations. The '**' symbol in the column 'ERA/IV' shows the reanalysis estimate and the boxplot is an estimate of the expected agreement given internal variability (see text).                                             | 11 |
| 55 | S10 | Persistence of blocking events (a,b - median, c,d - 90th percentile) for the ANOM index and boreal summer, for the ATL domain (-90-90E, 50-90N). The left-hand side of each panel shows metrics for PRIMAVERA simulations at different grid spacings (resolutions). Boxplots on the right-hand side show distributions of the persistence metric across CMIP5 and CMIP6 simulations. The '**' symbol in the column 'ERA/IV' shows the reanalysis estimate and the boxplot is an estimate of the expected agreement given internal variability (see text).                                             | 12 |
| 60 | S11 | Persistence of blocking events (a,b - median, c,d - 90th percentile) for the AGP index and boreal winter, for the PAC domain (90-270E, 50-75N). The left-hand side of each panel shows metrics for PRIMAVERA simulations at different grid spacings (resolutions). Boxplots on the right-hand side show distributions of the persistence metric across CMIP5 and CMIP6 simulations. The '**' symbol in the column 'ERA/IV' shows the reanalysis estimate and the boxplot is an estimate of the expected agreement given internal variability (see text). . . . .                                      | 13 |
| 65 | S12 | Persistence of blocking events (a,b - median, c,d - 90th percentile) for the AGP index and boreal summer, for the PAC domain (90-270E, 50-75N). The left-hand side of each panel shows metrics for PRIMAVERA simulations at different grid spacings (resolutions). Boxplots on the right-hand side show distributions of the persistence metric across CMIP5 and CMIP6 simulations. The '**' symbol in the column 'ERA/IV' shows the reanalysis estimate and the boxplot is an estimate of the expected agreement given internal variability (see text).                                              | 14 |
| 70 | S13 | Persistence of blocking events (a,b - median, c,d - 90th percentile) for the ANOM index and boreal winter, for the PAC domain (120-240E, 40-90N). The left-hand side of each panel shows metrics for PRIMAVERA simulations at different grid spacings (resolutions). Boxplots on the right-hand side show distributions of the persistence metric across CMIP5 and CMIP6 simulations. The '**' symbol in the column 'ERA/IV' shows the reanalysis estimate and the boxplot is an estimate of the expected agreement given internal variability (see text).                                            | 15 |
| 75 | S14 | Persistence of blocking events (a,b - median, c,d - 90th percentile) for the ANOM index and boreal summer, for the PAC domain (120-240E, 40-90N). The left-hand side of each panel shows metrics for PRIMAVERA simulations at different grid spacings (resolutions). Boxplots on the right-hand side show distributions of the persistence metric across CMIP5 and CMIP6 simulations. The '**' symbol in the column 'ERA/IV' shows the reanalysis estimate and the boxplot is an estimate of the expected agreement given internal variability (see text).                                            | 16 |

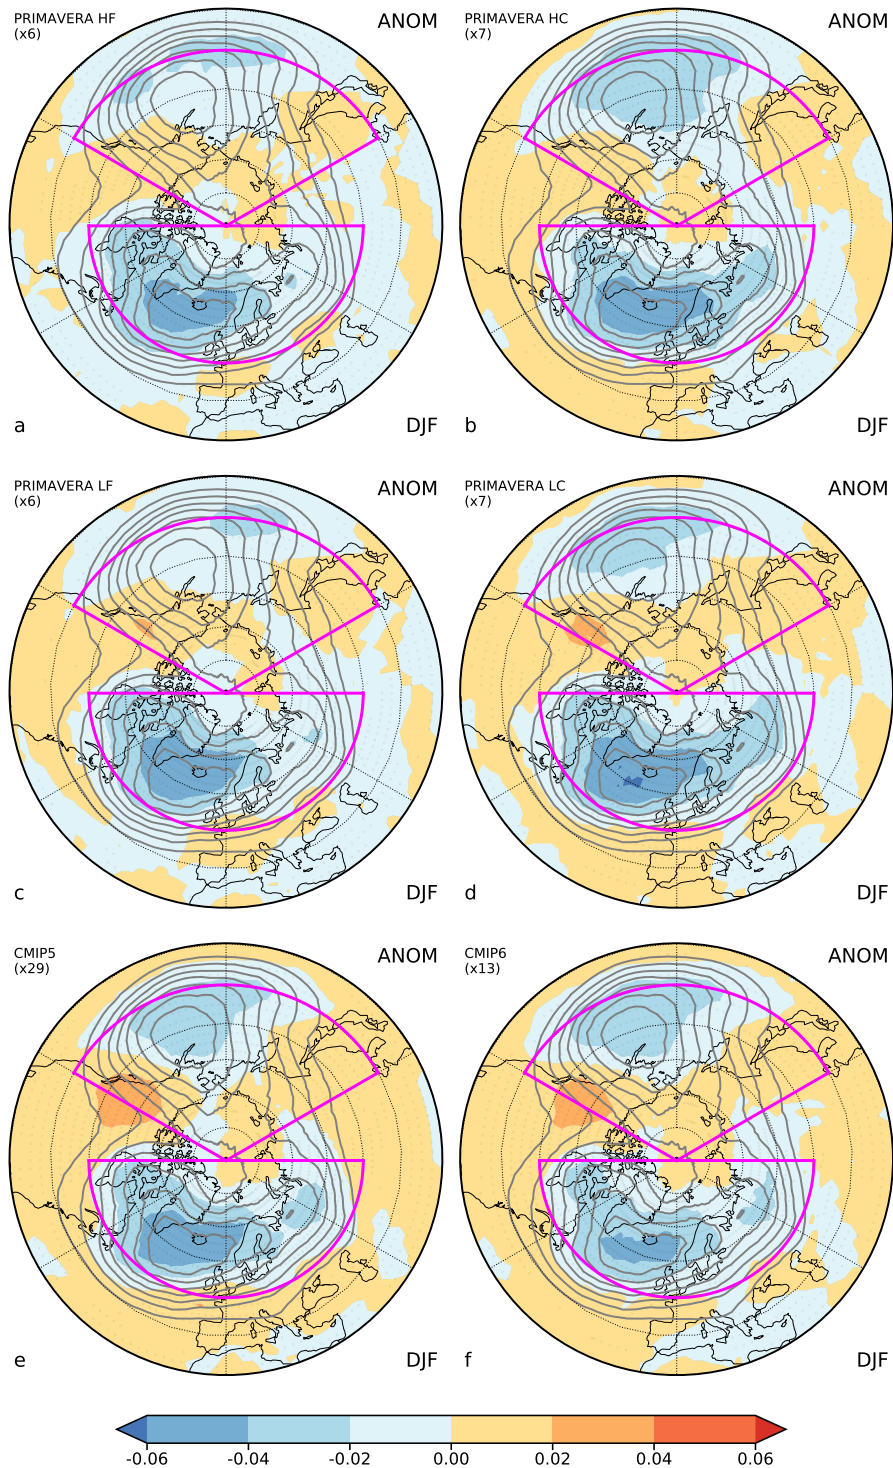

**Figure S1.** Blocking frequency bias for the ANOM index, boreal winter, and (a) high-resolution forced, (b) high-resolution coupled, (c) low-resolution forced, (d) low-resolution coupled PRIMAVERA simulations, and (e) CMIP5, (f) CMIP6 simulations. Stippling shows agreement on the sign of the bias by at least (a,c) 6 of 6, (b,d) 6 of 7, (e) 19 of 29, and (f) 10 of 13 simulations.

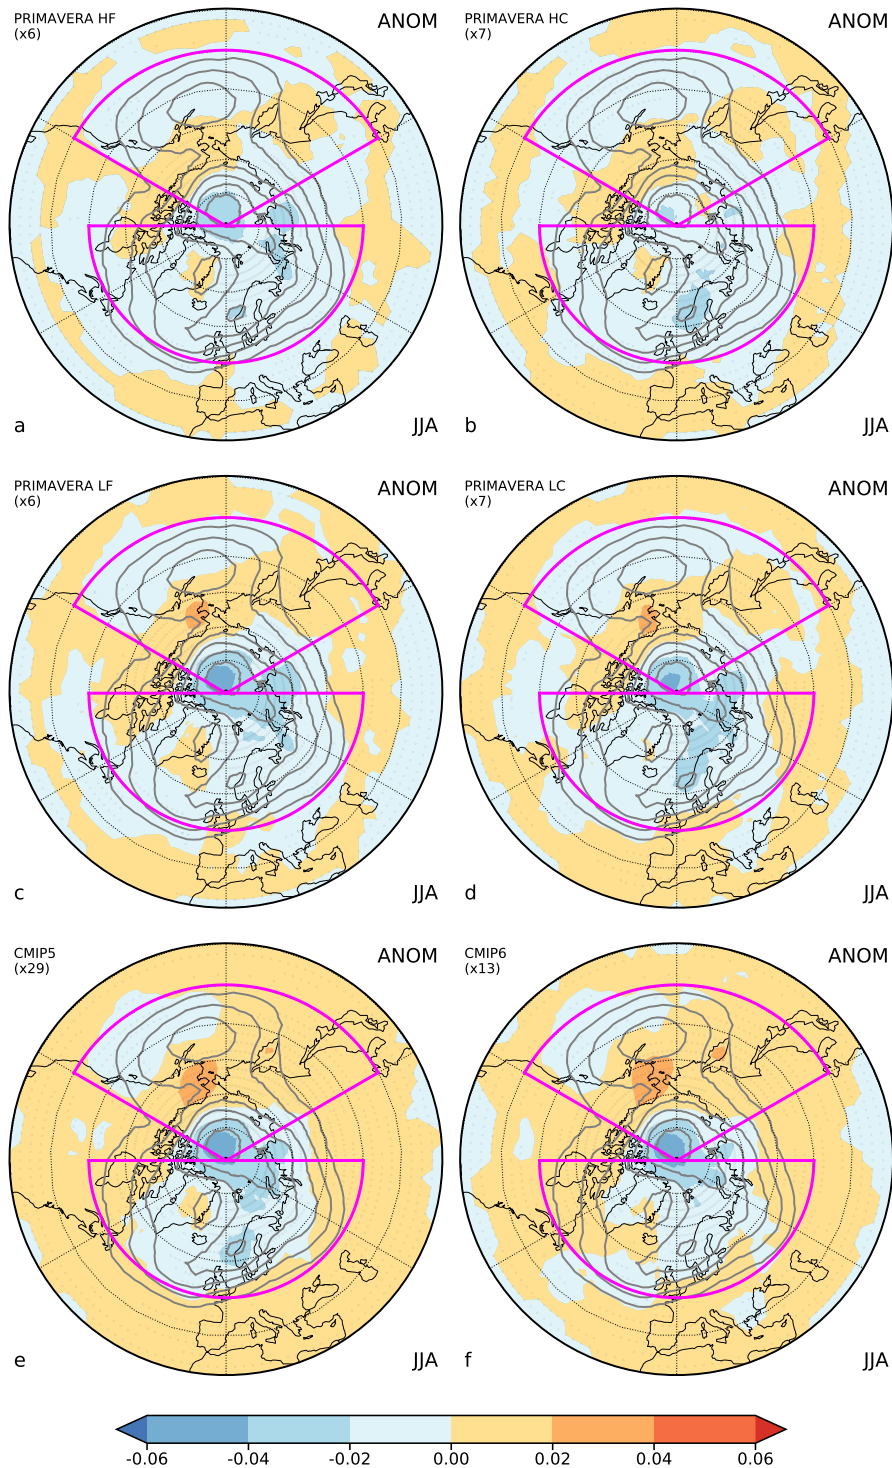

**Figure S2.** Blocking frequency bias for the ANOM index, boreal summer, and (a) high-resolution forced, (b) high-resolution coupled, (c) low-resolution forced, (d) low-resolution coupled PRIMAVERA simulations, and (e) CMIP5, (f) CMIP6 simulations. Stippling shows agreement on the sign of the bias by at least (a,c) 6 of 6, (b,d) 6 of 7, (e) 19 of 29, and (f) 10 of 13 simulations.

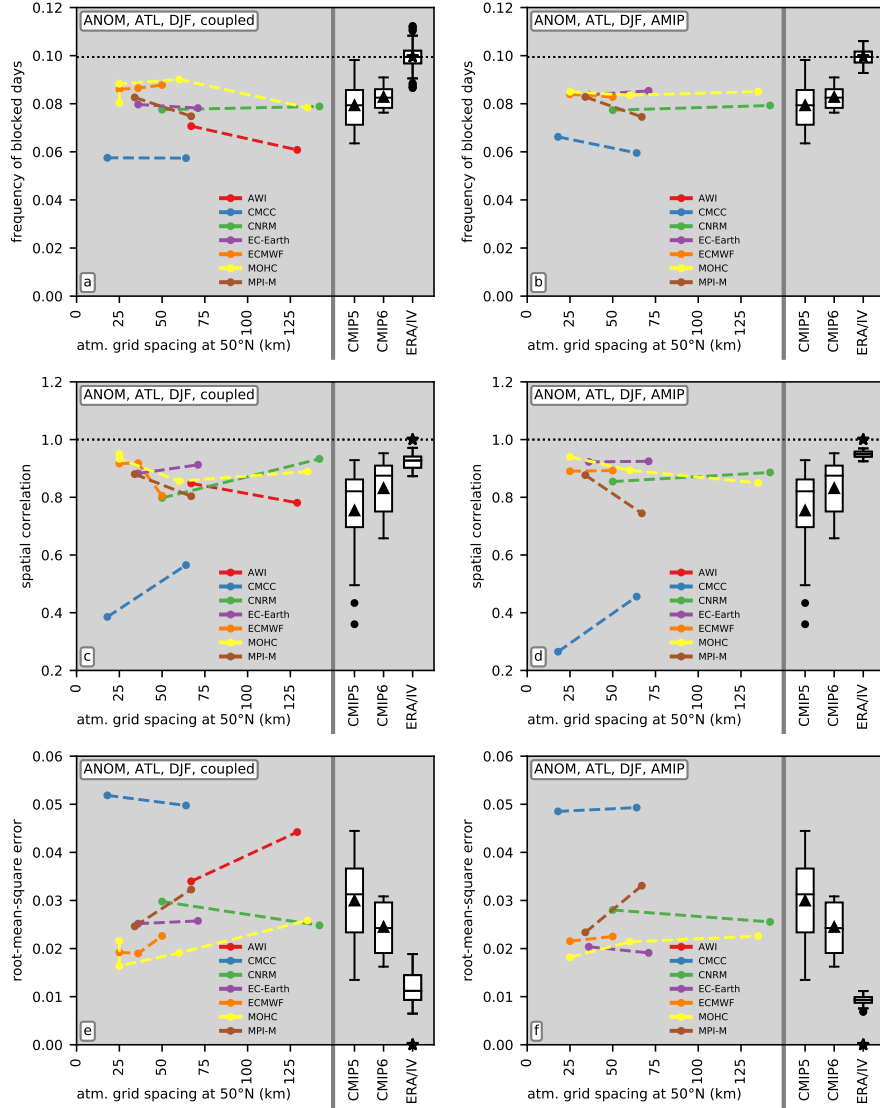

**Figure S3.** Metrics of blocking performance (a,b - blocking frequency, c,d - spatial correlation, e,f - root-mean-square error) for the ANOM index and boreal winter, for the ATL domain (-90-90E, 50-90N). The left-hand side of each panel shows metrics for PRIMAVERA simulations at different grid spacings (resolutions). Boxplots on the right-hand side show distributions of the metric across CMIP5 and CMIP6 simulations. The '\*' symbol in the column 'ERA/IV' shows the reanalysis estimate and the boxplot is an estimate of the expected agreement given internal variability (see text).

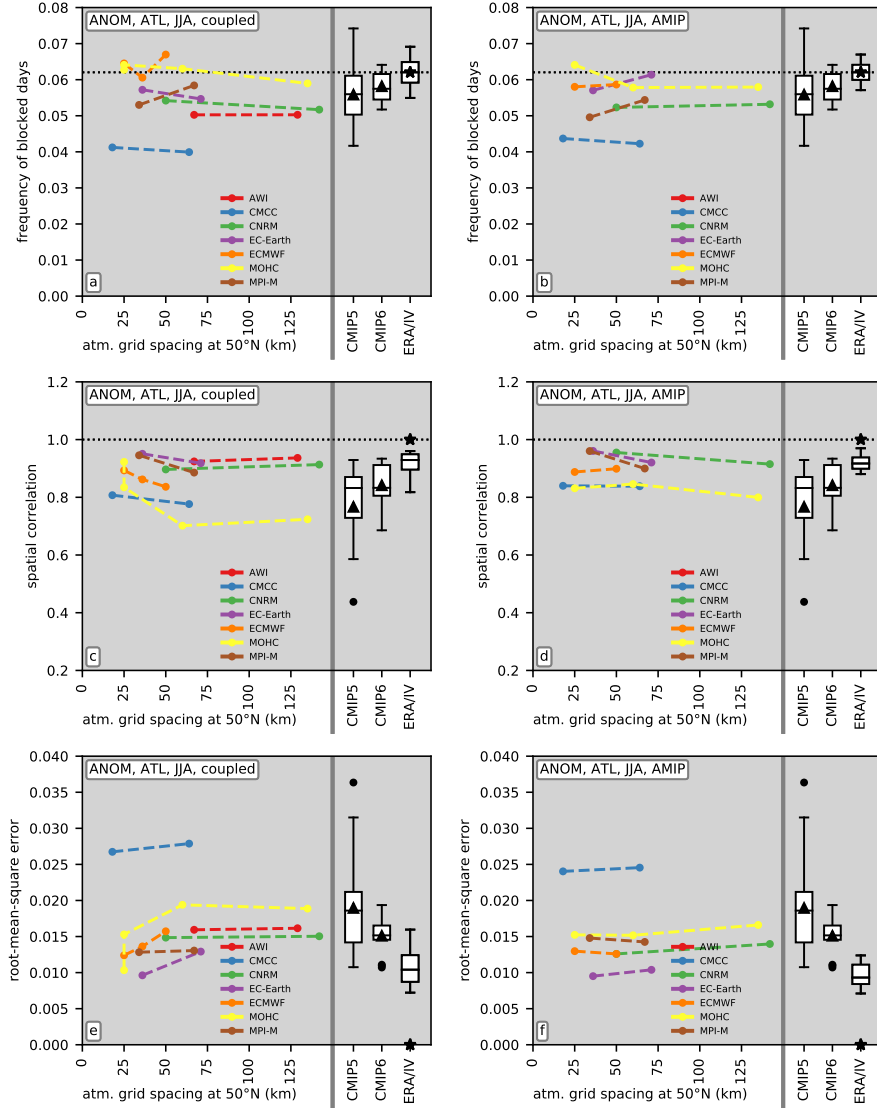

**Figure S4.** Metrics of blocking performance (a,b - blocking frequency, c,d - spatial correlation, e,f - root-mean-square error) for the ANOM index and boreal summer, for the ATL domain (-90-90E, 50-90N). The left-hand side of each panel shows metrics for PRIMAVERA simulations at different grid spacings (resolutions). Boxplots on the right-hand side show distributions of the metric across CMIP5 and CMIP6 simulations. The '\*' symbol in the column 'ERA/IV' shows the reanalysis estimate and the boxplot is an estimate of the expected agreement given internal variability (see text).

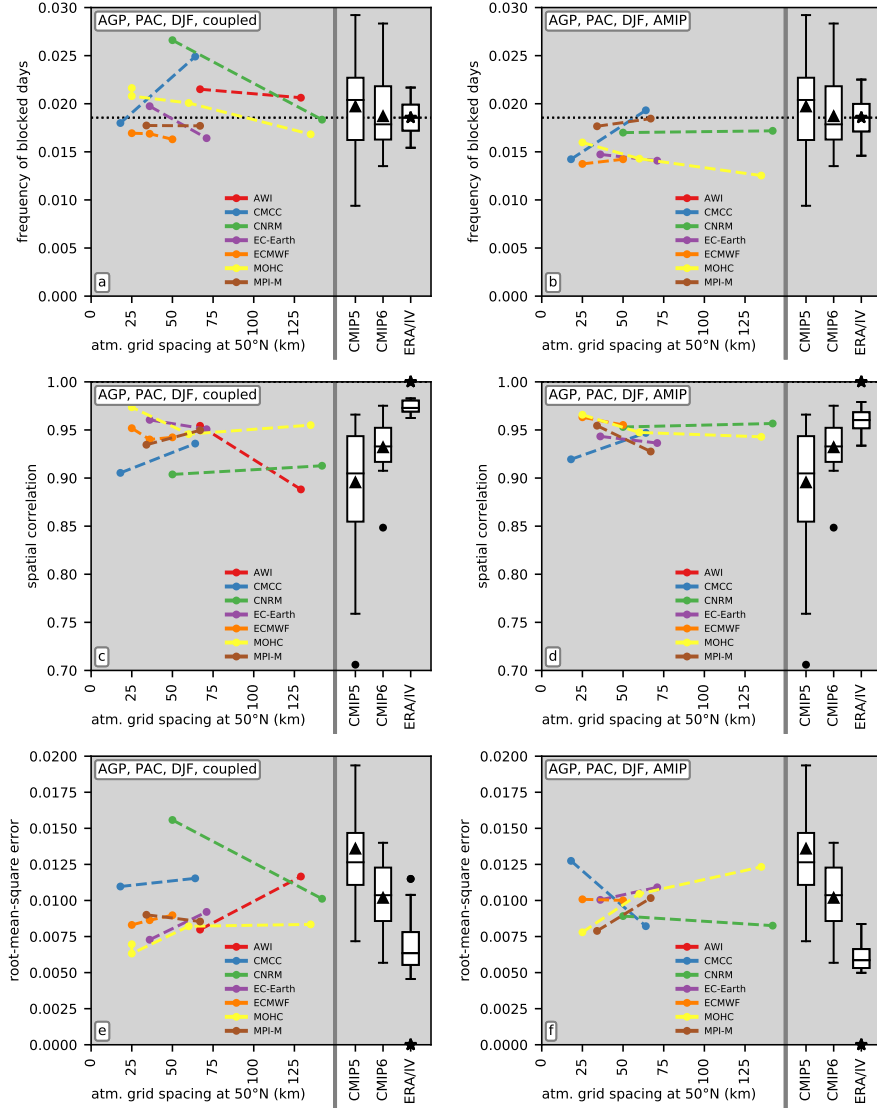

**Figure S5.** Metrics of blocking performance (a,b - blocking frequency, c,d - spatial correlation, e,f - root-mean-square error) for the AGP index and boreal winter, for the PAC domain (90-270E, 50-75N). The left-hand side of each panel shows metrics for PRIMAVERA simulations at different grid spacings (resolutions). Boxplots on the right-hand side show distributions of the metric across CMIP5 and CMIP6 simulations. The '\*' symbol in the column 'ERA/IV' shows the reanalysis estimate and the boxplot is an estimate of the expected agreement given internal variability (see text).

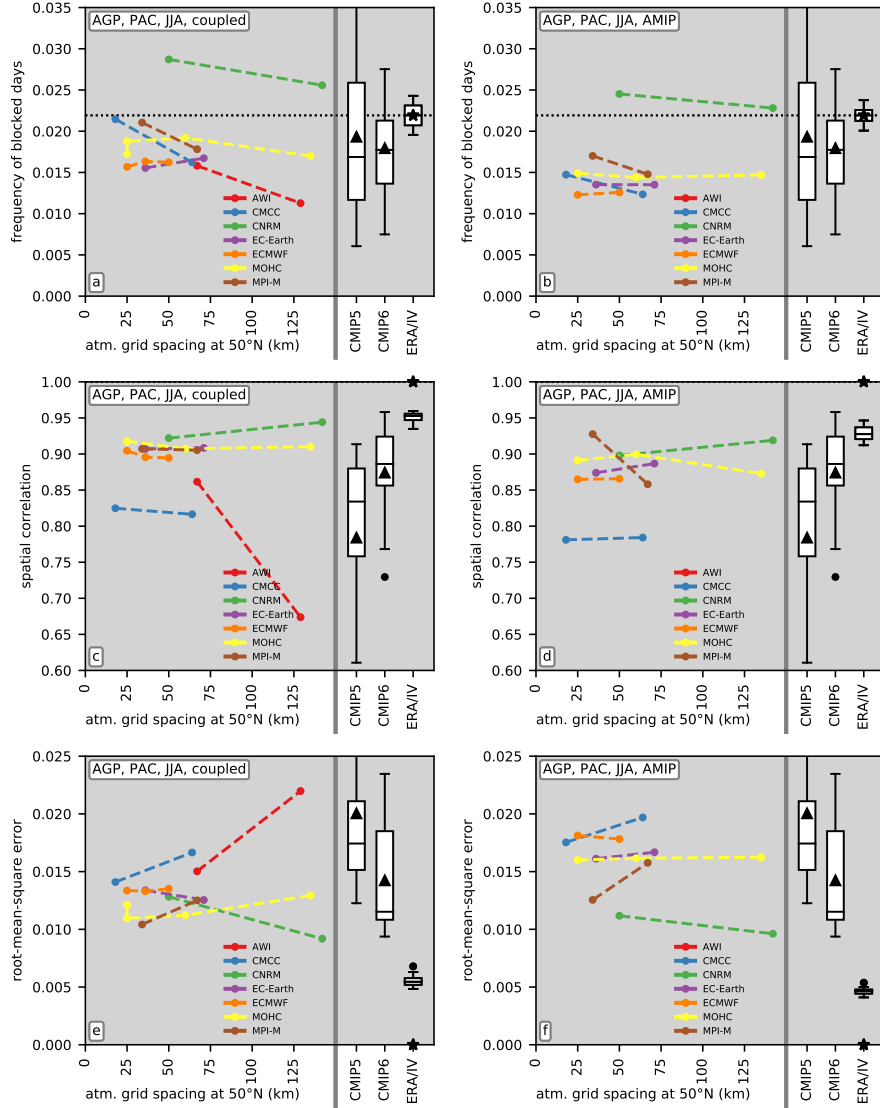

**Figure S6.** Metrics of blocking performance (a,b - blocking frequency, c,d - spatial correlation, e,f - root-mean-square error) for the AGP index and boreal summer, for the PAC domain (90-270E, 50-75N). The left-hand side of each panel shows metrics for PRIMAVERA simulations at different grid spacings (resolutions). Boxplots on the right-hand side show distributions of the metric across CMIP5 and CMIP6 simulations. The '\*' symbol in the column 'ERA/IV' shows the reanalysis estimate and the boxplot is an estimate of the expected agreement given internal variability (see text).



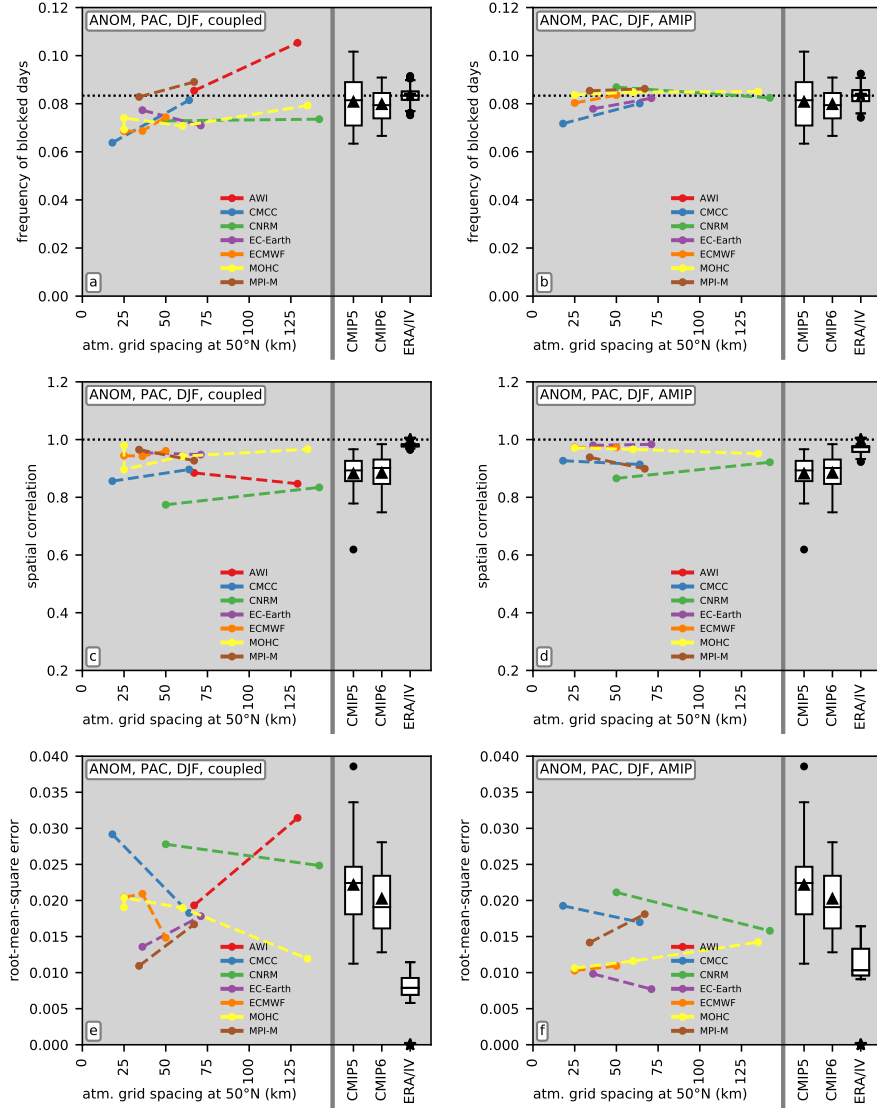

**Figure S7.** Metrics of blocking performance (a,b - blocking frequency, c,d - spatial correlation, e,f - root-mean-square error) for the ANOM index and boreal winter, for the PAC domain (120-240E, 40-90N). The left-hand side of each panel shows metrics for PRIMAVERA simulations at different grid spacings (resolutions). Boxplots on the right-hand side show distributions of the metric across CMIP5 and CMIP6 simulations. The '\*' symbol in the column 'ERA/IV' shows the reanalysis estimate and the boxplot is an estimate of the expected agreement given internal variability (see text).

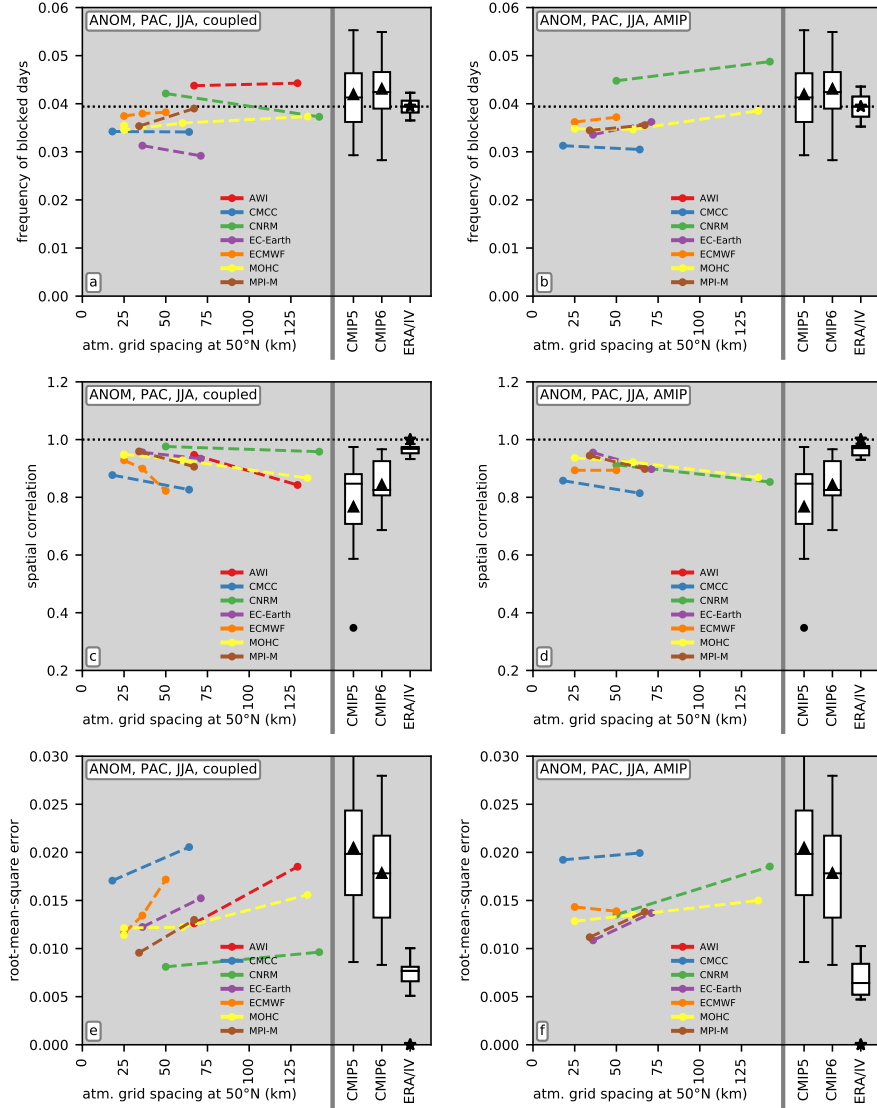

**Figure S8.** Metrics of blocking performance (a,b - blocking frequency, c,d - spatial correlation, e,f - root-mean-square error) for the ANOM index and boreal summer, for the PAC domain (120-240E, 40-90N). The left-hand side of each panel shows metrics for PRIMAVERA simulations at different grid spacings (resolutions). Boxplots on the right-hand side show distributions of the metric across CMIP5 and CMIP6 simulations. The '\*' symbol in the column 'ERA/IV' shows the reanalysis estimate and the boxplot is an estimate of the expected agreement given internal variability (see text).

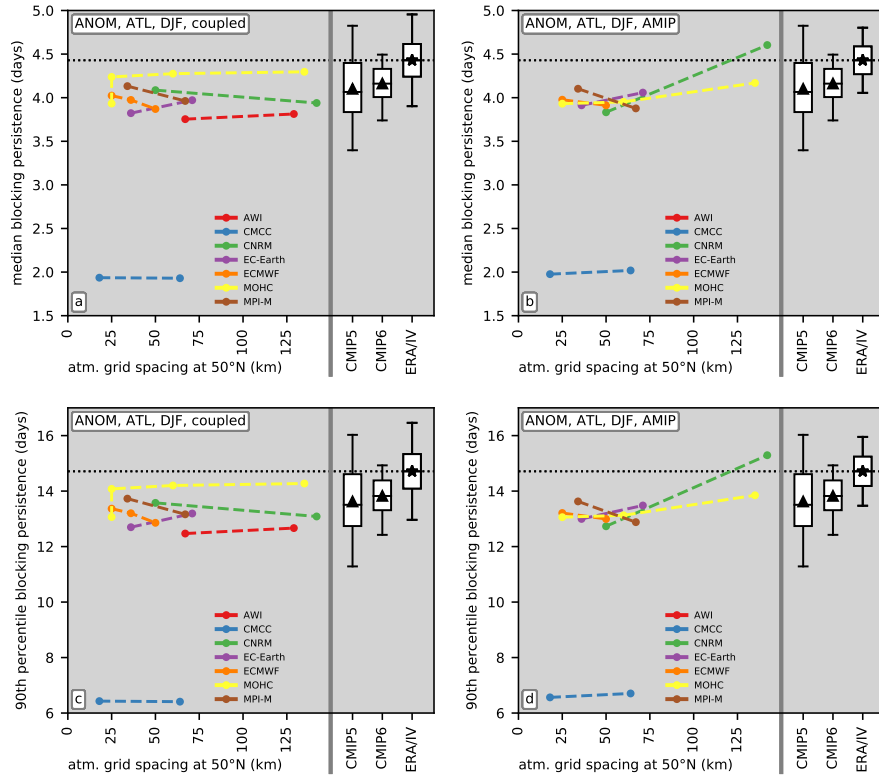

**Figure S9.** Persistence of blocking events (a,b - median, c,d - 90th percentile) for the ANOM index and boreal winter, for the ATL domain (-90-90E, 50-90N). The left-hand side of each panel shows metrics for PRIMAVERA simulations at different grid spacings (resolutions). Boxplots on the right-hand side show distributions of the persistence metric across CMIP5 and CMIP6 simulations. The '\*' symbol in the column 'ERA/IV' shows the reanalysis estimate and the boxplot is an estimate of the expected agreement given internal variability (see text).

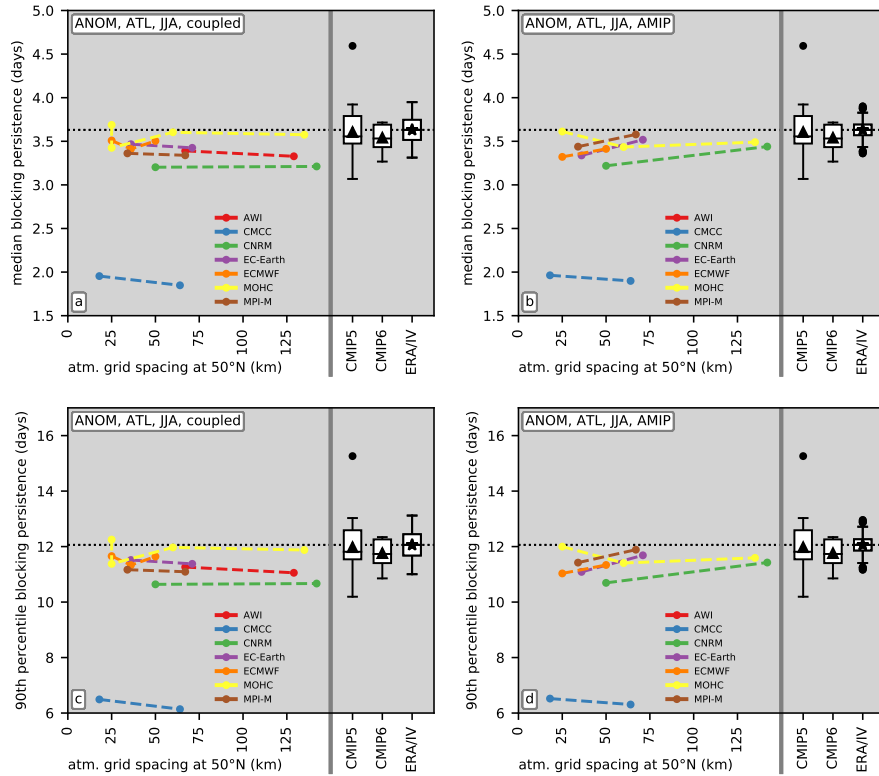

**Figure S10.** Persistence of blocking events (a,b - median, c,d - 90th percentile) for the ANOM index and boreal summer, for the ATL domain (-90-90E, 50-90N). The left-hand side of each panel shows metrics for PRIMAVERA simulations at different grid spacings (resolutions). Boxplots on the right-hand side show distributions of the persistence metric across CMIP5 and CMIP6 simulations. The '\*' symbol in the column 'ERA/IV' shows the reanalysis estimate and the boxplot is an estimate of the expected agreement given internal variability (see text).

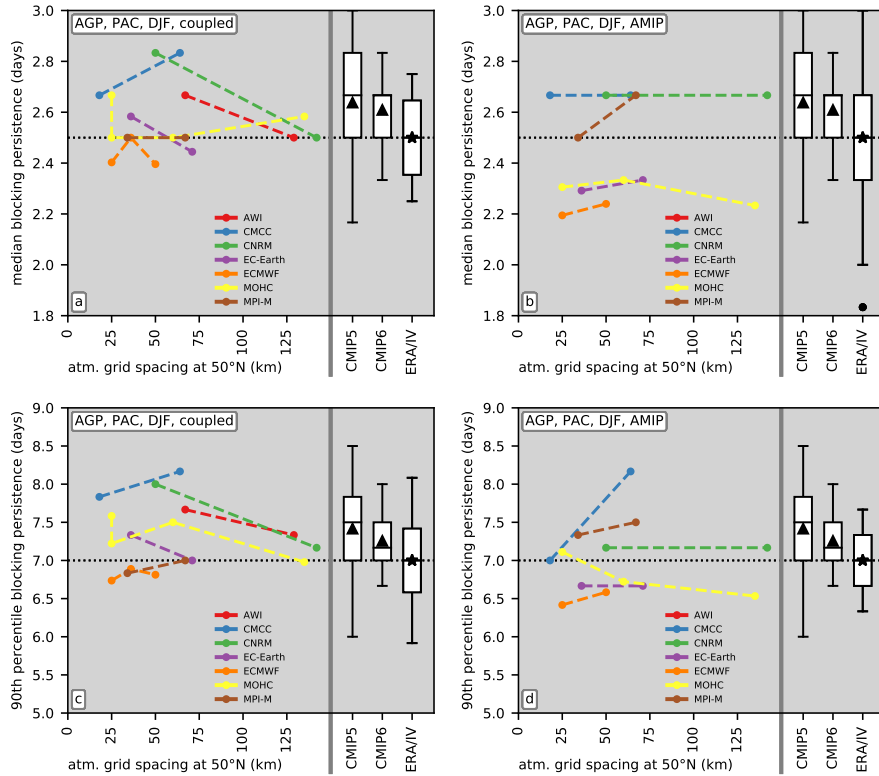

**Figure S11.** Persistence of blocking events (a,b - median, c,d - 90th percentile) for the AGP index and boreal winter, for the PAC domain (90-270E, 50-75N). The left-hand side of each panel shows metrics for PRIMAVERA simulations at different grid spacings (resolutions). Boxplots on the right-hand side show distributions of the persistence metric across CMIP5 and CMIP6 simulations. The '\*' symbol in the column 'ERA/IV' shows the reanalysis estimate and the boxplot is an estimate of the expected agreement given internal variability (see text).

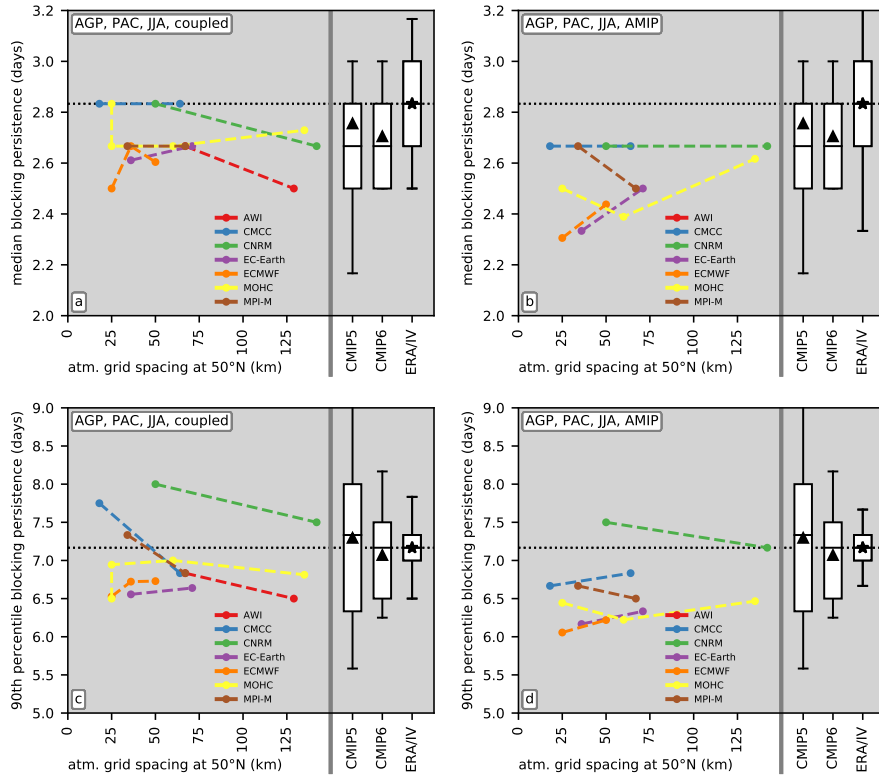

**Figure S12.** Persistence of blocking events (a,b - median, c,d - 90th percentile) for the AGP index and boreal summer, for the PAC domain (90-270E, 50-75N). The left-hand side of each panel shows metrics for PRIMAVERA simulations at different grid spacings (resolutions). Boxplots on the right-hand side show distributions of the persistence metric across CMIP5 and CMIP6 simulations. The '\*' symbol in the column 'ERA/IV' shows the reanalysis estimate and the boxplot is an estimate of the expected agreement given internal variability (see text).

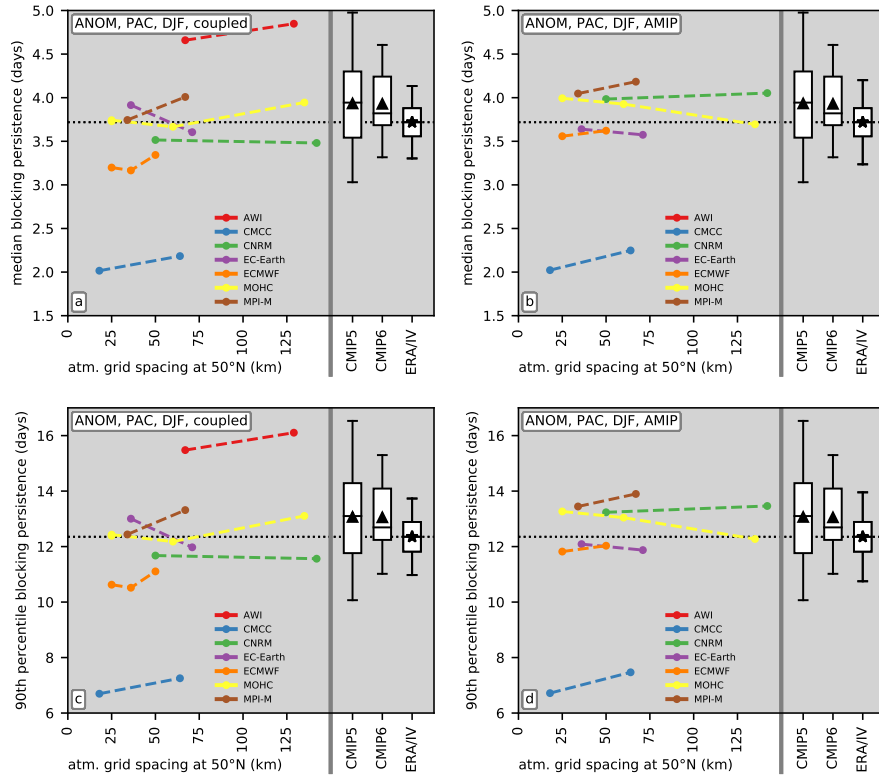

**Figure S13.** Persistence of blocking events (a,b - median, c,d - 90th percentile) for the ANOM index and boreal winter, for the PAC domain (120-240E, 40-90N). The left-hand side of each panel shows metrics for PRIMAVERA simulations at different grid spacings (resolutions). Boxplots on the right-hand side show distributions of the persistence metric across CMIP5 and CMIP6 simulations. The '\*' symbol in the column 'ERA/IV' shows the reanalysis estimate and the boxplot is an estimate of the expected agreement given internal variability (see text).

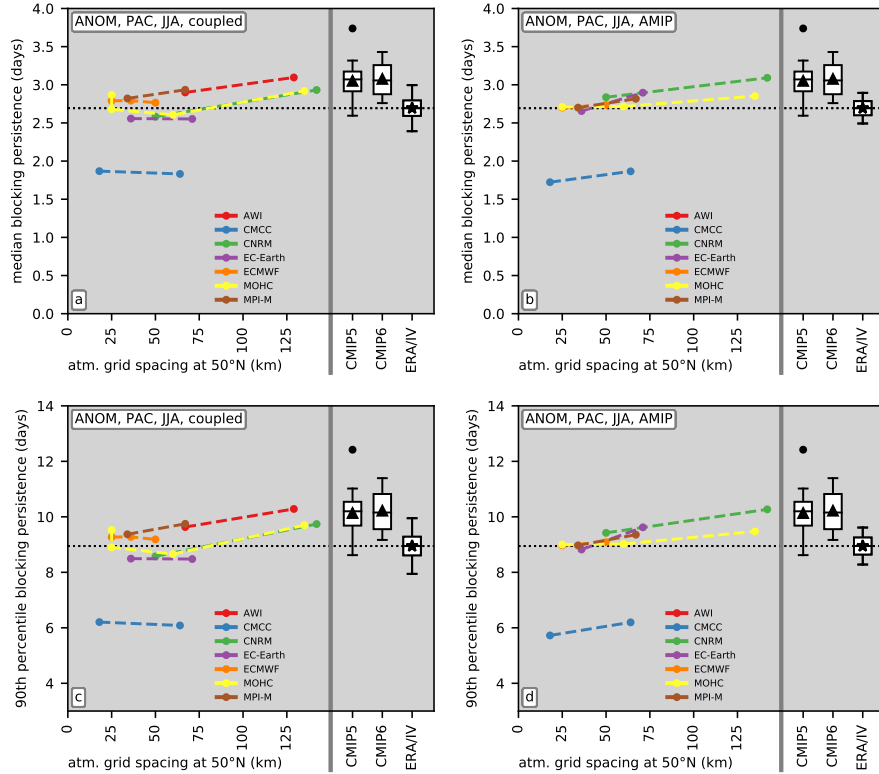

**Figure S14.** Persistence of blocking events (a,b - median, c,d - 90th percentile) for the ANOM index and boreal summer, for the PAC domain (120-240E, 40-90N). The left-hand side of each panel shows metrics for PRIMAVERA simulations at different grid spacings (resolutions). Boxplots on the right-hand side show distributions of the persistence metric across CMIP5 and CMIP6 simulations. The '\*' symbol in the column 'ERA/IV' shows the reanalysis estimate and the boxplot is an estimate of the expected agreement given internal variability (see text).
